# Supplementary material for: SGOL2 promotes prostate cancer progression by inhibiting RAB1A ubiquitination
Source: publisher site journal article supplement (doi:10.18632/aging.204443), 2022-12-23
Supplement: Supplementary file [file aging-v14i24-204443-supplementary-material-SD2.pdf]

## SUPPLEMENTARY TABLES

**Supplementary Table 1. Antibodies used in WB, Co-IP, and IHC.**

| Primary antibodies             | Dilution in WB    | Source species | Company     | Catalog No. |
|--------------------------------|-------------------|----------------|-------------|-------------|
| SGOL2                          | 1:1000            | Rabbit         | Bioss       | bs-21166R   |
| RAB1A                          | 1:1000            | Rabbit         | Proteintech | 11671-1-AP  |
| Ubiquitin                      | 1:1000            | Mouse          | CST         | 3936S       |
| GADPH                          | 1:3000            | Mouse          | Proteintech | 60004-1-Ig  |
| Primary antibodies             | Dilution in Co-IP | Source species | Company     | Catalog No. |
| SGOL2                          | 1:50              | Rabbit         | Novus       | NB100-60455 |
| RAB1A                          | 1:100             | Rabbit         | Proteintech | 11671-1-AP  |
| Primary antibodies             | Dilution in IHC   | Source species | Company     | Catalog No. |
| SGOL2                          | 1:100             | Rabbit         | Abcam       | ab122258    |
| Secondary antibodies           |                   | Dilution       | Company     | Catalog No. |
| HRP Goat Anti-Rabbit IgG (WB)  |                   | 1:3000         | Beyotime    | A0208       |
| HRP Goat Anti-Mouse IgG (WB)   |                   | 1:3000         | Beyotime    | A0216       |
| Goat Anti-Rabbit IgG H&L (HRP) |                   | 1:400          | Abcam       | ab97080     |
| IgG (IHC)                      |                   |                | Beyotime    | A7016       |

**Supplementary Table 2. Relationship between SGOL2 expression and tumor characteristics in patients with prostate cancer.**

|                      |                      | SGOL2    |
|----------------------|----------------------|----------|
| Gleason Score        | Spearman correlation | 0.213*   |
|                      | (two-tailed)         | 0.042*   |
|                      | N                    | 91       |
| Grade                | Spearman correlation | 0.285*   |
|                      | (two-tailed)         | 0.006**  |
|                      | N                    | 91       |
| lymphatic metastasis | Spearman correlation | 0.341**  |
|                      | (two-tailed)         | 0.001**  |
|                      | N                    | 91       |
| Stage                | Spearman correlation | 0.409**  |
|                      | (two-tailed)         | 0.000*** |
|                      | N                    | 91       |

P<0.05; \*\*, P<0.01; \*\*\*, P<0.001.
